# Supplementary material for: Loss of wbpL disrupts O‐polysaccharide synthesis and impairs virulence of plant‐associated Pseudomonas strains
Source: PubMed Central journal article supplement (PMC6804347; doi:10.1111/mpp.12864), 2019-09-27
Supplement: MPP-20-1535-s001.pdf [file MPP-20-1535-s001.pdf]

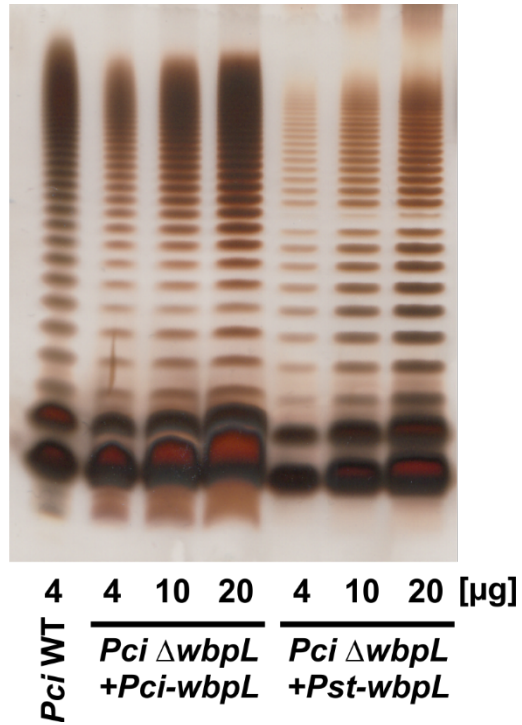

**Figure S1:** 12% Bis-Tris NuPAGE gel and silver staining of lipopolysaccharide (LPS) preparations from *Pseudomonas cichorii* ATCC10857/DSM50259 (*Pci*) wild-type (WT),  $\Delta$ *wbpL*::*Gm<sup>R</sup>* ( $\Delta$ *wbpL*) deletion mutant strains complemented with plasmid-expressed *wbpL* ortholog from either *Pci* (+*Pci-wbpL*) or *Pst* (*Pst-wbpL*). LPS was isolated by hot phenol-water extraction followed by a phenol-chloroform-petroleum ether extraction. The amount of applied LPS is indicated below the respective lane.
